# Supplementary material for: Boosting photocatalytic CO2 reduction over S-scheme CTF–Bi–BiOBr using pre-oxidized dissolved effluent organic matter as an electron donor
Source: Royal Society of Chemistry journal article supplement (doi:10.1039/d3en00488k), 2023-01-01
Supplement: d3en00488k1.pdf [file d3en00488k1.pdf]

## Supporting Information

### **Boosting photocatalytic CO<sub>2</sub> reduction over S-scheme CTF-Bi-BiOBr using pre-oxidized dissolved effluent organic matter as electron donors**

Guocheng Huang,<sup>a</sup> Jiusheng Zhao,<sup>a</sup> Jinpeng Zhang,<sup>a</sup> Tiansu Zhao,<sup>a</sup> Jinhong Bi,<sup>\*ab</sup> Min Pan,<sup>c</sup> Po Keung Wong<sup>d</sup> and Alex Tat-Shing Chow<sup>\*e</sup>

<sup>a</sup>*Department of Environmental Science and Engineering, Fuzhou University, Minhou, Fujian 350108, China*

<sup>b</sup>*State Key Laboratory of Photocatalysis on Energy and Environment, Fuzhou University, Minhou, Fujian 350108, China*

<sup>c</sup>*Department of Applied Science, School of Science and Technology, Hong Kong Metropolitan University, Ho Man Tin, Kowloon, Hong Kong SAR, China*

<sup>d</sup>*School of Life Sciences, The Chinese University of Hong Kong, Shatin, NT, Hong Kong SAR, China*

<sup>e</sup>*Earth and Environmental Science Programme, The Chinese University of Hong Kong, Shatin, NT, Hong Kong SAR, China*

## *Characterization and photoelectrochemical measurements*

### *1. Materials characterization*

The surface morphology and microstructure of the materials were analyzed by the scanning electron microscopy (SEM, FEI Nova Nano SEM 230) and high-resolution transmission electron microscopy (HRTEM, FEI TECNAI G2 F20). The crystal structures of the samples were measured by powder X-ray diffraction (PXRD) on a Rigaku MiniFlex 600 X-ray diffractometer with Ni-filtered Cu K $\alpha$  irradiation ( $\alpha = 1.5406 \text{ \AA}$ ) and the range of measurement condition was set from  $5^\circ$  to  $80^\circ$ . The Brunauer-Emmett-Teller (BET) specific surface areas of the samples were obtained by an ASAP 2020 apparatus (Micromeritics Instrument Corp.). The functional groups were analyzed by Fourier transform infrared (FT-IR) spectrum in an analytical instrument of Thermo Scientific Nicolet iS10 spectrometer using KBr pellets at a resolution of  $4 \text{ cm}^{-1}$ . X-ray photoelectron spectroscopy (XPS, PHI Quantum 2000) equipped with a monochromatic Al K $\alpha$  was measured in order to analyze the elemental composition and particular surface chemical state of the samples. All binding energies were referenced to the C 1s peak (284.6 eV) from the air contamination carbon. In order to explore the optical character, the solid-state UV-vis diffuse reflectance spectra (UV-vis DRS) were conducted by a Varian Cary 500 Scan UV-vis-NIR spectrophotometer, and barium sulfate was used as a referent. The photoluminescence (PL) spectra were performed in a spectrophotometer (G9800A, Agilent, America) with excitation wavelength at 420 nm. All the tests were performed under the room temperature.

### *2. Photoelectrochemical measurements*

The photoelectrochemical measurements including the transient photocurrent tests, Mott-Schottky analyses, and electrochemical impedance spectroscopy (EIS) were carried out by an electrochemical workstation (CHI 650E, Shanghai Chenhua Instrument Co. Ltd. China) with a standard three-electrode system (a platinum plate electrode, an Ag/AgCl electrode and a working electrode) in a  $0.2 \text{ M Na}_2\text{SO}_4$  electrolyte

solution. The working electrode fabrication was as follows: 5 mg photocatalyst powder was dispersed into the mixture of 400  $\mu\text{L}$  ethanol and 50  $\mu\text{L}$  nafion solution under sonication for 4 h. 10  $\mu\text{L}$  of the obtained suspension was dipped onto a piece of fluoride-tin oxide (FTO) glass substrate with a designed area of  $0.5 \times 0.5 \text{ cm}^2$  and the residual parts of the FTO glass were coated with epoxy. Finally, the as-prepared working electrode was dried under room temperature. The transient photocurrent analyses were characterized by an electrochemical workstation (CHI 650E) equipped with a conventional three-electrode cell, and 0.2 M  $\text{Na}_2\text{SO}_4$  aqueous solution was used as an electrolyte. Moreover, a 300 W Xe lamp (PLS-SXE300C) with a 420 nm cut-off filter was used as the visible-light source. The Mott-Schottky analyses, and EIS were carried out by CHI 650E electrochemical workstation. Besides, the mixture of 10 mM  $\text{K}_3[\text{Fe}(\text{CN})_6]$  and 0.1 M KCl and 0.2 M  $\text{Na}_2\text{SO}_4$  aqueous solution were used as the electrolyte, respectively. All the measurements were repeated at least three times in the same condition.

### *3. $dE_jOM$ characterization*

The concentration of wastewater was identified by TOC measurement (TOC-L CPH, Shimadzu, Japan). To further explore the specific effects of untreated sewage and oxidized sewage on photocatalytic  $\text{CO}_2$  reduction, a series of sewage characterizations including Fourier transform infrared (FT-IR) spectrum, X-ray photoelectron spectroscopy (XPS), UV-vis spectrophotometer, and fluorescence 3D electron microscopy studies were carried out in a new type of model designed to infer the possible characteristics of effluents and intermediates.

The Fourier transform infrared (FT-IR) spectrum and X-ray photoelectron spectroscopy (XPS) were measured to identify the elemental constitute and functional groups. The sewage samples were freeze-dried in advance, and the measurement conditions were the same as photocatalysts characterization. The UV-vis absorption spectra were measured to obtain the spectral slope ratio ( $S_R$ ) which was calculated as the slope in wavelength of 275-295 nm divided by slope in wavelength of 350-400 nm.

The 3D excitation-emission-matrix (EEM) spectra were conducted in condition that the excitation wavelength was 250-400 nm in 5 nm intervals and the emission wavelength was 300-500 nm in 5 nm intervals. The emission and excitation slits were set at 10 nm, and the scanning speed was controlled in 12000 nm/min. The acquired data was further analyzed by matlab 12.0. Parallel factor analysis (PARAFAC) method.

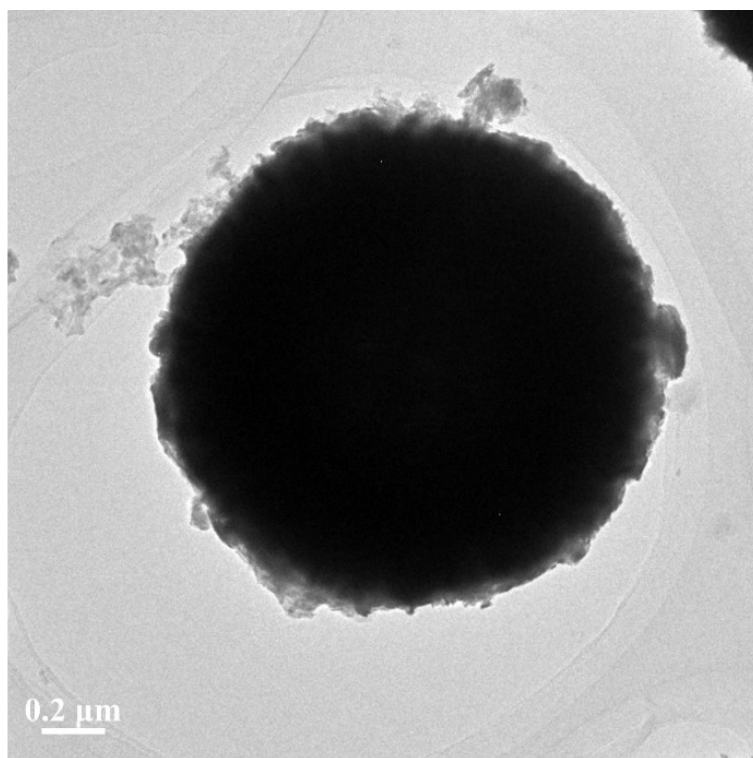

**Fig. S1.** TEM image of 20% CTF-1-Bi-BiOBr.

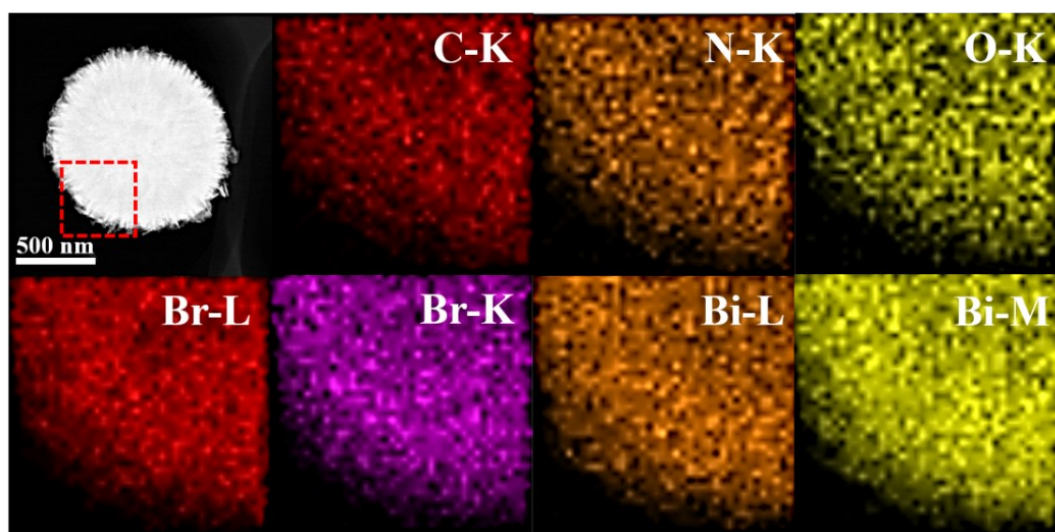

**Fig. S2.** Energy dispersive X-ray (EDX) mappings of 20% CTF-1-Bi-BiOBr.

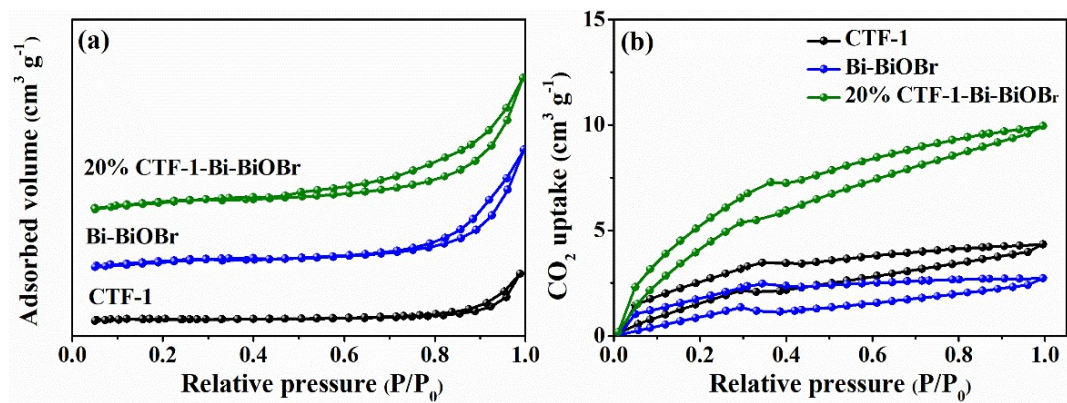

Fig. S3. (a) BET and (b) CO<sub>2</sub> adsorption curves of CTF-1, Bi-BiOBr and 20% CTF-1-Bi-BiOBr.

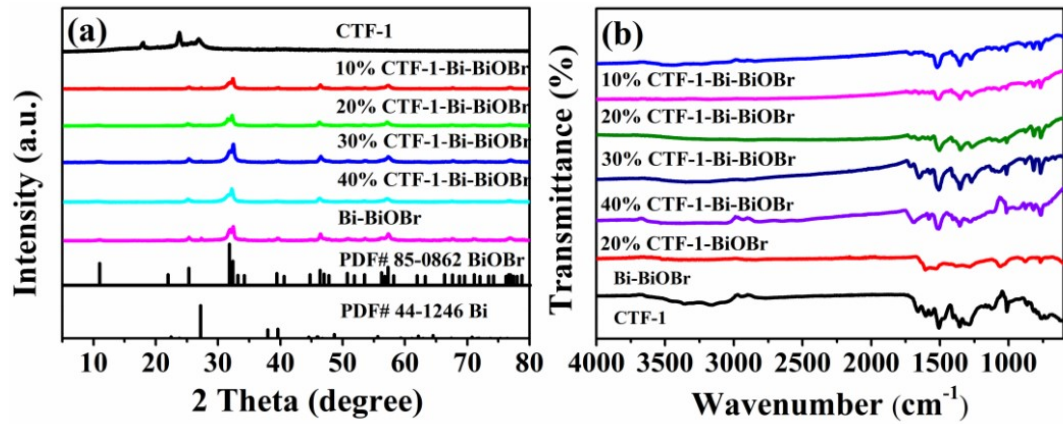

Fig. S4. (a) XRD patterns and (b) FT-IR spectra of CTF-1, Bi-BiOBr, and CTF-1-Bi-BiOBr composites.



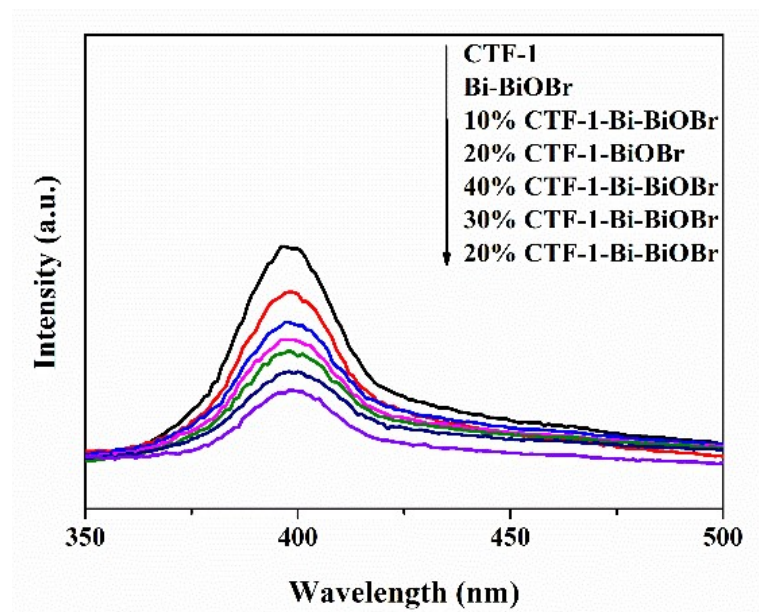

**Fig. S5.** PL spectra of CTF-1, Bi-BiOBr, 20% CTF-1-BiOBr and CTF-1-Bi-BiOBr composites.

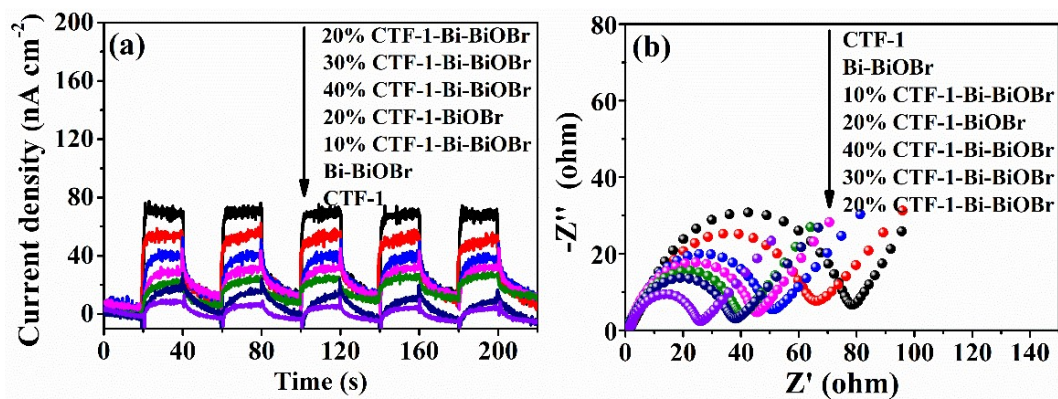

Fig. S6. (a) The transient photocurrent responses and (b) the EIS plots of CTF-1, BiOBr, 20% CTF-1-BiOBr and CTF-1-Bi-BiOBr composites.

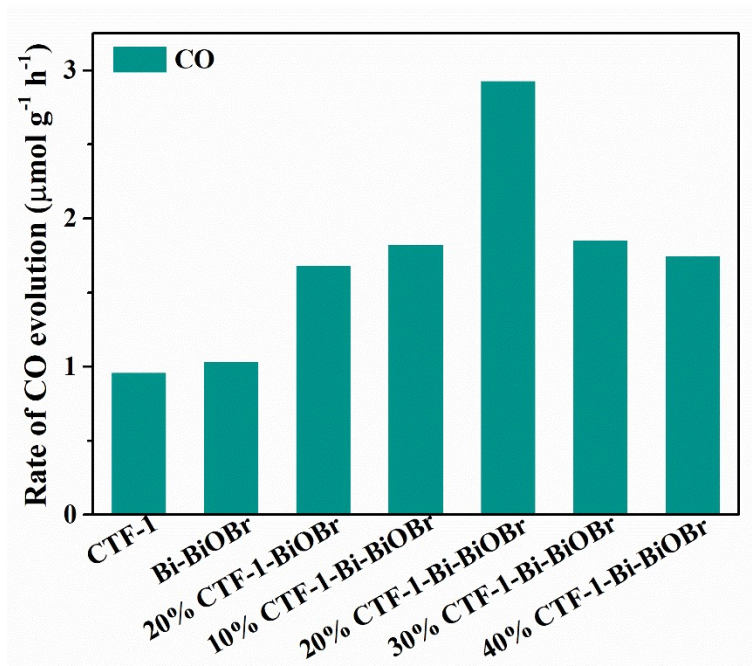

**Fig. S7.** Photocatalytic anoxic  $\text{CO}_2$  reduction activities in the presence of different as-prepared samples and pre-oxidized 4 h  $\text{dE}_r\text{OM}$ .

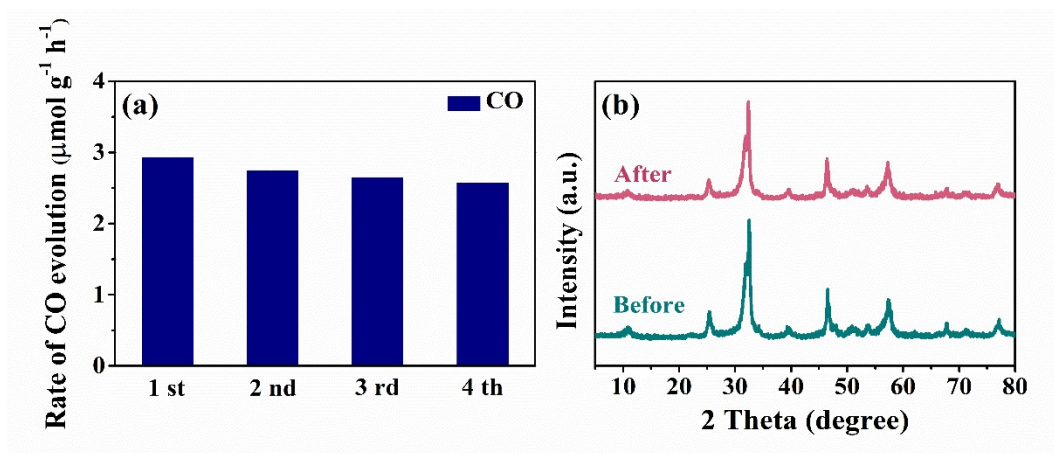

Fig. S8. (a) The photocatalytic  $\text{CO}_2$  reduction stability tests of 20% CTF-1-Bi-BiOBr and (b) XRD patterns of 20% CTF-1-Bi-BiOBr before and after reactions.

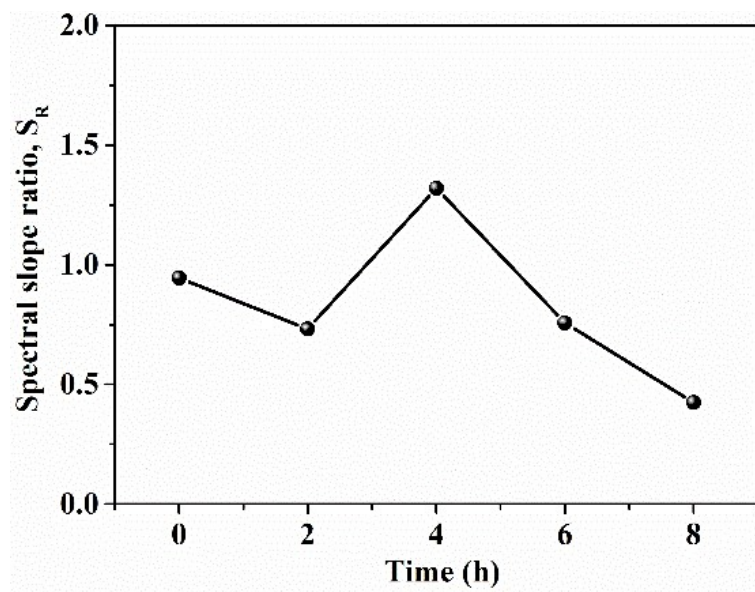

**Fig. S9.** Variation of the spectral slope ratio,  $S_R$ , under different pre-oxidized time.

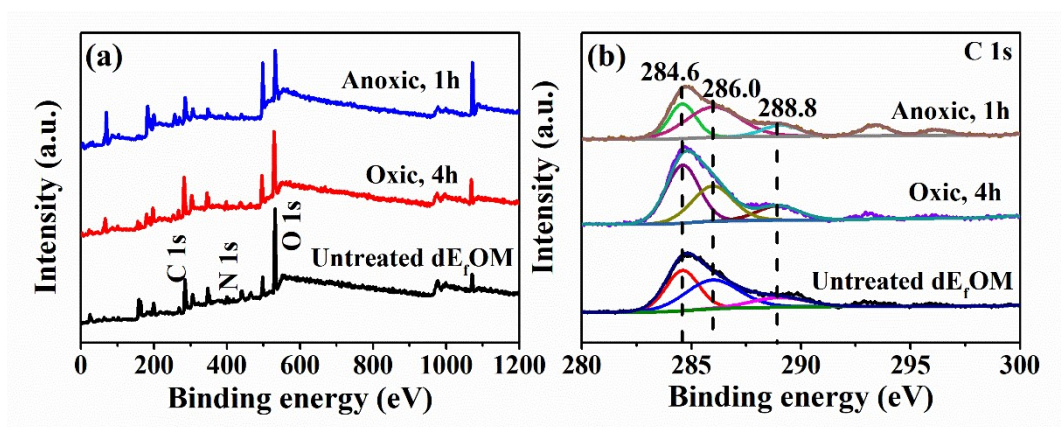

**Fig. S10.** (a) XPS and (b) C 1s high-resolution spectra of untreated dE<sub>f</sub>OM, pre-oxidized sewage for 4 h and anoxic photocatalytic treated sewage for 1 h (using the pre-oxidized dE<sub>f</sub>OM for 4 h as sacrificial reagent).

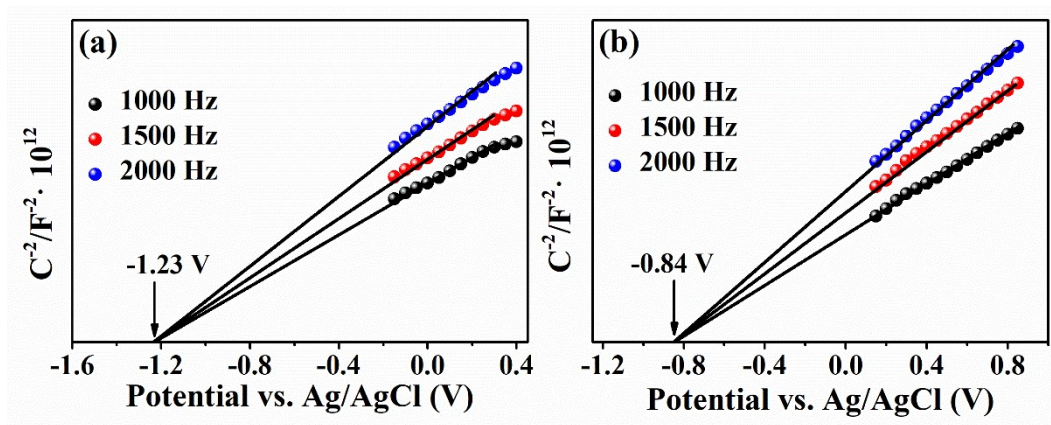

Fig. S11. Mott-Schottky plots for (a) CTF-1 and (b) BiOBr.

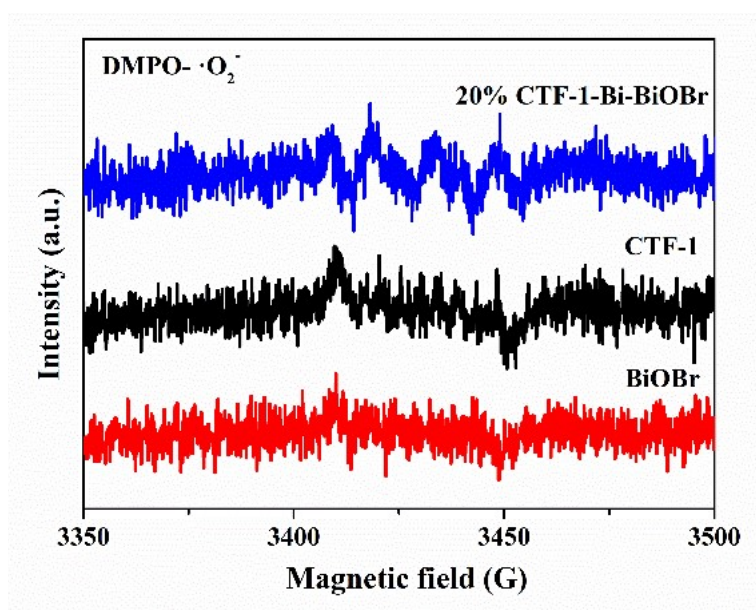

**Fig. S12.** DPMO spin-trapping ESR spectra for CTF-1, BiOBr and 20% CTF-1-Bi-BiOBr in methanol dispersion for DMPO- $\cdot\text{O}_2^-$ .



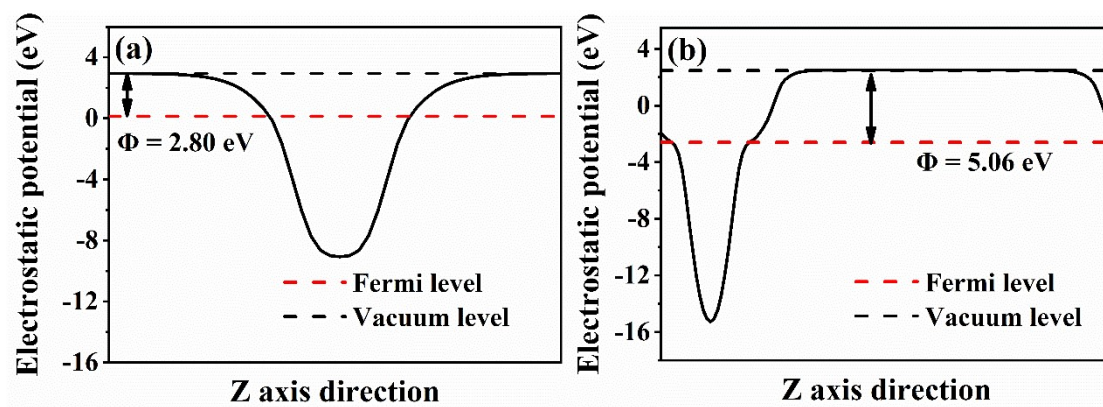

Fig. S13. The calculated work function of the (a) CTF-1 and (b) the (110) plane of BiOBr.

**Table S1** BET surface area and pore volume of CTF-1, Bi-BiOBr and 20% CTF-1-Bi-BiOBr.

| <b>Sample</b>      | <b>BET surface area<br/>(m<sup>2</sup> g<sup>-1</sup>)</b> | <b>Pore volume<br/>(cm<sup>3</sup> g<sup>-1</sup>)</b> |
|--------------------|------------------------------------------------------------|--------------------------------------------------------|
| CTF-1              | 9.3                                                        | 0.04                                                   |
| Bi-BiOBr           | 25.6                                                       | 0.09                                                   |
| 20% CTF-1-Bi-BiOBr | 38.1                                                       | 0.11                                                   |

**Table S2** Main assignments of the sewage FT-IR spectra.

| <b>Wavenumber (cm<sup>-1</sup>)</b> | <b>Assignments</b>                                        |
|-------------------------------------|-----------------------------------------------------------|
| 700                                 | Out-plane bending vibration of aromatic hydrocarbon (C-H) |
| 832                                 | Out-plane bending vibration of C-H of olefin              |
| 870                                 | Out-plane bending vibration of amine (N-H)                |
| 1070                                | Aliphatic OH                                              |
| 1380                                | C-O bond of carboxylic acids                              |
| 1647                                | C=O stretching of carboxylate (COO <sup>-</sup> )         |

**Table S3** Comparisons of atomic concentration ratios and functional groups with respect to total carbon during the consecutive oxic-anoxic treatment.

| Samples                      | chemical functions (molar ratio with respect to total carbon, %) |                 |                              |
|------------------------------|------------------------------------------------------------------|-----------------|------------------------------|
|                              | 284.6 eV<br>C-C/C-H                                              | 286.0 eV<br>C-O | 288.8 eV<br>O=C-OH<br>O=C-OR |
| Untreated dE <sub>f</sub> OM | 38.18                                                            | 55.24           | 6.59                         |
| Oxic,4 h                     | 24.39                                                            | 60.30           | 15.31                        |
| Oxic,4 h+Anoxic,1 h          | 27.09                                                            | 47.92           | 11.96                        |
